# Supplementary material for: Exploratory Activities for Understanding Evolutionary Relationships Depicted by Phylogenetic Trees: United but Diverse
Source: Oxford University Press journal article supplement (doi:10.1525/abt.2020.82.5.333), 2020-05-01
Supplement: abt_82_5_333_ds008.docx [file abt_82_5_333_ds008.docx]

**DNA SEQUENCES (Original 10 Species)**

>Humans (Homo_sapiens)

ACTCTTCTGGTCCCCACAGACTCAGAGAGAACCCACCATGGTGCTGTCTCCTGCCGACAAGACCAACGTC

AAGGCCGCCTGGGGTAAGGTCGGCGCGCACGCTGGCGAGTATGGTGCGGAGGCCCTGGAGAGGATGTTCC

TGTCCTTCCCCACCACCAAGACCTACTTCCCGCACTTCGACCTGAGCCACGGCTCTGCCCAGGTTAAGGG

CCACGGCAAGAAGGTGGCCGACGCGCTGACCAACGCCGTGGCGCACGTGGACGACATGCCCAACGCGCTG

TCCGCCCTGAGCGACCTGCACGCGCACAAGCTTCGGGTGGACCCGGTCAACTTCAAGCTCCTAAGCCACT

GCCTGCTGGTGACCCTGGCCGCCCACCTCCCCGCCGAGTTCACCCCTGCGGTGCACGCCTCCCTGGACAA

GTTCCTGGCTTCTGTGAGCACCGTGCTGACCTCCAAATACCGTTAAGCTGGAGCCTCGGTGGCCATGCTT

CTTGCCCCTTGGGCCTCCCCCCAGCCCCTCCTCCCCTTCCTGCACCCGTACCCCCGTGGTCTTTGAATAA

AGTCTGAGTGGGCGGCA

>Tiger (Panthera_tigris)

GGCCCCGCACCTTCTGGTCCCGACACAGATCAGAACCAACCATGGTGCTGTCTTCCGCCGACAAGAACAA

CGTCAAGGCCTGCTGGGGTAAGATTGGGTCCCATGCCGGCGAATATGGCGCAGAGGCCCTGGAGAGGACC

TTCTGCTCCTTCCCCACCACCAAGACCTACTTCCCCCACTTCGACCTGAGCCACGGCTCCGCCCAGGTCC

AGACCCACGGCCAGAAGGTGGCCGACGCGCTGACGAAGGCCGTGGCCCACATAAACGACCTGCCTAACGC

CCTGTCGGATCTGAGCGACCTGCACGCGTACAAGCTGCGTGTGGACCCCGTCAACTTCAAGTTCCTGAGC

CACTGCCTGCTGGTGACCCTGGCCTGCCACCACCCCGAGGAATTCACCCCCGCCGTCCACGCCTCCCTGG

ACAAGTTCTTCAGCGCTGTGAGCACCGTGCTGACCTCCAAATACCGTTGAGTGAAGCCGGGGCGATCGTC

CTGAGGGCCCGGGGCCTCTTGGGCTCCGGGCACCCGAACTTCCTGATCTTTGAATAAAGTCTGAGTGGGC

TGCAA

>Dog (Canis_lupus)

CGAGGCCTCCCGGCCCCGCACATTTCTGGTTCTCCTCAGACTCAGAAGGAACCCACCATGGTGCTGTCTC

CCGCCGATAAGACCAACATCAAGTCCACTTGGGATAAGATTGGTGGCCACGCTGGCGACTACGGCGGAGA

GGCGCTGGACAGGACCTTCCAGTCCTTCCCCACCACCAAGACCTACTTCCCGCACTTCGACCTGAGCCCC

GGCTCCGCCCAGGTCAAGGCCCACGGCAAGAAGGTGGCTGATGCGCTGACCACCGCCGTGGCCCACCTGG

ACGACCTGCCCGGTGCCCTGTCCGCCCTCAGCGACCTGCACGCCTACAAGCTGCGCGTGGACCCCGTCAA

CTTCAAGCTCCTGAGCCACTGCCTGCTGGTGACCCTGGCCTGCCACCACCCCACCGAATTCACCCCTGCC

GTCCACGCCTCCCTGGACAAGTTCTTCGCCGCCGTGAGCACCGTGCTGACCTCCAAGTACCGTTAAGCTG

CAGCCATGGCGGCGGGAGCCCCTGCCCTGGGCCCCTGGGTGGCCTCCTGCAACCGTGCCCTACACTTCCT

GATGTTTGAATAAAGTCTGAGTGGGCTGCAGCCTC

>Bear (Ursus_maritimus)

CCGCCCCGCACATTTCTGGTCCTCACAGACTCAGAAAGAAGCCACCATGGTGCTGTCTCCCGCCGACAAG

AGCAACGTCAAGGCCACCTGGGATAAGATCGGCAGCCACGCTGGCGAGTATGGCGGCGAGGCTCTGGAGA

GGACCTTCGCGTCCTTCCCCACCACCAAGACCTACTTCCCCCACTTCGACCTGAGCCCTGGCTCCGCCCA

GGTCAAGGCCCACGGCAAGAAGGTGGCCGACGCCCTGACCACCGCCGCAGGCCACCTGGACGACCTGCCG

GGCGCCCTGTCCGCTCTGAGCGACCTGCACGCGCACAAGCTGCGAGTGGACCCGGTCAACTTCAAGTTCC

TGAGCCACTGCCTGCTGGTGACCCTGGCCAGCCACCACCCCGCGGAGTTCACCCCTGCCGTCCACGCCTC

CCTGGACAAGTTCTTCAGCGCCGTGAGCACCGTGCTCACCTCCAAATACCGTTAAGCTGGAGCCGCGCGA

CCCTCCCGCTCCCGGCCTGGGGCCTCTTGCGCTCCACGCGCCTGAACTTCCCGATCTTTGAATAAAGTCT

GAGTGGGCTGCAG

>Mouse (Mus_musculus)

GACACTTCTGATTCTGACAGACTCAGGAAGAAACCATGGTGCTCTCTGGGGAAGACAAAAGCAACATCAA

GGCTGCCTGGGGGAAGATTGGTGGCCATGGTGCTGAATATGGAGCTGAAGCCCTGGAAAGGATGTTTGCT

AGCTTCCCCACCACCAAGACCTACTTCCCTCACTTTGATGTAAGCCACGGCTCTGCCCAGGTCAAGGGTC

ACGGCAAGAAGGTCGCCGATGCTCTGGCCAATGCTGCAGGCCACCTCGATGACCTGCCCGGTGCCCTGTC

TGCTCTGAGCGACCTGCATGCCCACAAGCTGCGTGTGGATCCCGTCAACTTCAAGCTCCTGAGCCACTGC

CTGCTGGTGACCTTGGCTAGCCACCACCCTGCCGATTTCACCCCCGCGGTGCATGCCTCTCTGGACAAAT

TCCTTGCCTCTGTGAGCACCGTGCTGACCTCCAAGTACCGTTAAGCTGCCTTCTGCGGGGCTTGCCTTCT

GGCCATGCCCTTCTTCTCTCCCTTGCACCTGTACCTCTTGGTCTTTGAATAAAGCCTGAGTAGGAAGAAA

AAAAAAAAA

>Rat (Rattus_norvegicus)

ACATTCTCCTTCTGATAGACTCAGGAAGCAATCATGGTGCTCTCTGCAGATGACAAAACCAACATCAAGA

ACTGCTGGGGGAAGATTGGTGGCCATGGTGGTGAATATGGCGAGGAGGCCCTACAGAGGATGTTCGCTGC

CTTCCCCACCACCAAGACCTACTTCTCTCACATTGATGTAAGCCCCGGCTCTGCCCAGGTCAAGGCTCAC

GGCAAGAAGGTTGCTGATGCCTTGGCCAAAGCTGCAGACCACGTCGAAGACCTGCCTGGTGCCCTGTCCA

CTCTGAGCGACCTGCATGCCCACAAACTGCGTGTGGATCCTGTCAACTTCAAGTTCCTGAGCCACTGCCT

GCTGGTGACCTTGGCTTGCCACCACCCTGGAGATTTCACACCCGCCATGCACGCCTCTCTGGACAAATTC

CTTGCCTCTGTGAGCACTGTGCTGACCTCCAAGTACCGTTAAGCCGCCTCCTGCCGGGCTTGCCTTCTGA

CCAGGCCCTTCTTCCCTCCCTTGCACCTATACCTCTTGGTCTTTGAATAAAGCCTGAGTAGGAAGC

>Hamster (Cricetulus_griseus)

CTCAATACACTTCTGACTCTGACAGACTCAGGAAAGAATCACCATGGTGCTCTCTGCGGACGACAAGAAC

AACATCAAGGGTGCCTGGGGCAAGATTGGCGGCCACGGTGCTGAATATGGCGCGGAGGCCCTAGAGAGGA

TGTTCGTTACCTACCCCACCACCAAGACCTACTTCCCTCACTTTGATGTAAGCCACGGCTCTGCCCAGGT

CAAGGCCCACGGCGCAAAGGTCGCAGACGCCCTGGCCAAGGCCGCTAGCCACCTCGATGACCTGCCCGGC

ACCCTGTCCTCTCTGAGCGACCTGCACGCCCACGAGCTGCGTGTGGACCCTGTCAACTTCAAGCTCCTGA

GCCACTGCCTGCTGGTGACCCTGGCCAACCACCACCCAGCCGACTTCACCCCCGCGGTGCACGCCTCTCT

GGACAAATTCCTTGCCTCTGTGAGCACCGTCCTGACCTCCAAGTACCGTTAAACTGGA

>Macaque (Macaca_mulatta)

CACAGACTCAGAAAGAACCCACCATGGTGCTGTCTCCTGCCGACAAGAGCAACGTCAAGGCCGCCTGGGG

TAAGGTCGGCGGGCACGCTGGCGAGTATGGTGCGGAGGCCCTGGAGAGGATGTTCCTGTCCTTCCCCACC

ACCAAGACCTACTTCCCCCACTTCGACCTGAGCCACGGCTCTGCCCAGGTTAAGGGCCACGGCAAGAAGG

TGGCCGACGCGCTGACCCTCGCCGTGGGGCACGTGGACGACATGCCCCAAGCGCTGTCCGCGCTGAGCGA

CCTGCACGCGCACAAGCTTCGGGTGGACCCGGTCAACTTCAAGCTCCTGAGCCACTGCCTGCTGGTGACT

CTGGCCGCTCACCTCCCCGCCGAGTTCACCCCTGCGGTGCACGCCTCCCTGGACAAGTTCCTGGCTTCTG

TGAGCACCGTGCTGACCTCCAAATACCGTTAAGCTGGAGCCTCGGTGGCCATGCTTCTTGCCCCTTGGGC

CTCCCGCCAGGCCCTCCTCCCCTCCTTGCACCGGCCCTTCCTGGTCTTTGAATAAAGTCTG

>Chimpanzee (Pan_troglodytes)

ACTCTTCTGGTCCCCACAGACTCAGAAAGAACCCACCATGGTGCTGTCTCCTGCCGACAAGACCAACGTC

AAGGCCGCCTGGGGTAAGGTCGGCGCGCACGCTGGCGAGTATGGTGCGGAGGCCCTGGAGAGGATGTTCC

TGTCCTTCCCCACCACCAAGACCTACTTCCCCCACTTCGACCTGAGCCACGGCTCTGCCCAGGTTAAGGG

TCACGGCAAGAAGGTGGCCGACGCGCTGACCAACGCCGTGGCGCACGTGGACGACATGCCCAACGCGCTG

TCCGCCCTGAGTGACCTGCACGCGCACAAGCTTCGGGTGGACCCGGTCAACTTCAAGCTCCTAAGCCACT

GCCTGCTGGTGACCCTGGCCGCCCACCTCCCCGCCGAGTTCACCCCTGCGGTGCACGCCTCCCTGGACAA

GTTCCTGGCTTCTGTGAGCACCGTGCTGACCTCCAAATACCGTTAAGCTGGAGCCTCGGTGGCCATGCTT

CTTGCCCCTTGGGCCTCTCGCCAGGCCCTCCTCTCCTTCCTGCACCTGTACCCCCCCTGGTCTTTGAATA

AAGTCTGAGTGGGCGGC

>Chicken (Gallus_gallus)

GGGGCTGCCAACACAGAGGTGCAACCATGGTGCTGTCCGCTGCTGACAAGAACAACGTCAAGGGCATCTT

CACCAAAATCGCCGGCCATGCTGAGGAGTATGGCGCCGAGACCCTGGAAAGGATGTTCACCACCTACCCC

CCAACCAAGACCTACTTCCCCCACTTCGATCTGTCACACGGCTCCGCTCAGATCAAGGGGCACGGCAAGA

AGGTAGTGGCTGCCTTGATCGAGGCTGCCAACCACATTGATGACATCGCCGGCACCCTCTCCAAGCTCAG

CGACCTCCATGCCCACAAGCTCCGCGTGGACCCTGTCAACTTCAAACTCCTGGGCCAATGCTTCCTGGTG

GTGGTGGCCATCCACCACCCTGCTGCCCTGACCCCGGAGGTCCATGCTTCCCTGGACAAGTTCTTGTGCG

CCGTGGGCACTGTGCTGACCGCCAAGTACCGTTAAGACGGCACGGTGGCTAGAGCTGGGGCCAACCCATC

GCCAGCCCTCCGACAGCGAGCAGCCAAATGAGATGAAATAAAATCTGTTGCATTTGTGCTCCAG
