# Supplementary material for: Exploratory Activities for Understanding Evolutionary Relationships Depicted by Phylogenetic Trees: United but Diverse
Source: Oxford University Press journal article supplement (doi:10.1525/abt.2020.82.5.333), 2020-05-01
Supplement: abt_82_5_333_ds009.docx [file abt_82_5_333_ds009.docx]

**DNA SEQUENCES (6 Discovery Species)**

>Tarsier (Carlito_syrichta)

GCAGGATGTTCCTGTCCTTCCCCACCACCAAGACCTACTTCCCCCACTTCGACCTGAGCCACGGCTCCAG

CCAGGTCAAAGGCCACGGCAAGAAGGTGGCCGACGCGCTGACCACCGCCGTAGGGCACATGGACGACATG

CCCAACGCCCTGTCCGCTCTGAGTGACCTGCACGCGCACAAGCTGCGGGTGGACCCGGTCAACTTCAAGC

TCCTGAGCCACTGCCTGCTGGTGACCCTGGCCTGCCACCACCCTGCGGACTTCACCCCTGCCGTGCATGC

CTCCCTGGACAAGTTCCTGGCCTCTGTGAGCACCGTGCTGACCTCCAAATACCGTTAAGCTGGAGCCCGG

GTGGCCTCCCGGGGCCCTCCTCCCTTCCCTGCACCCGCACCTTCTGGTCTCTCAATAAAGTCTGAGTGGG

TGGCAA

>Whale (Orcinus_orca)

ACGCTTCTGGTCCTGACCCAGACTCAGAGAGAACCCACCATGGTGCTGTCTCCCGCCGACAAGACCAACG

TCAAGGGCACCTGGGCTAAGATTGGCAACCACAGTGCAGAATATGGCGCAGAGGCCCTGGAGAGGATGTT

CATAAACTTCCCCAGCACCAAGACCTACTTCTCCCACTTCGACCTGGGACACGGCTCCGCTCAGATCAAG

GGGCACGGCAAGAAGGTGGCCGACGCGCTCACCAAAGCCGTGGGCCACATAGACAACCTGCCCGATGCCT

TGTCTGAGCTGAGCGACCTGCACGCCCACAAGCTGCGTGTGGACCCGGTCAACTTCAAGCTCCTGAGCCA

CTGCCTGCTGGTGACCCTGGCTCTCCACCTCCCCGCCGATTTCACGCCCTCGGTCCATGCCTCCCTGGAC

AAGTTCTTGGCCAGTGTGAGCACCGTGCTGACCTCCAAATACCGTTAAGCTGGAGCCTCCGCGATTCCTA

CCCTGGCCTGGGGCCCTCTGGCGCTCTGGGCACCCTCACTTCCCGATCTTTGAATAAAGTCTGAGTGGGC

TGCA

>Platypus (Ornithorhynchus_anatinus)

AGGGAATCTGGTCCTGACCCGATTTGGAAAGGAGCAAAGATGCTGACCGACGCCGAGAAGAAGGAAGTGA

CCGCCCTGTGGGGCAAGGCCGCCGGTCACGGCGAGGAGTACGGCGCGGAGGCCCTGGAGAGGCTGTTCCA

GGCTTTCCCCACCACCAAGACCTACTTCTCCCACTTCGACCTGAGCCACGGCTCCGCTCAGATCAAGGCT

CATGGCAAGAAGGTGGCCGACGCTCTGTCCACGGCCGCGGGGCACTTCGATGACATGGACAGCGCCCTGT

CCGCTCTGAGCGACCTGCACGCCCACAAGCTGAGAGTGGACCCGGTCAACTTCAAACTGCTGGCTCACTG

CATCCTGGTTGTCCTGGCCAGGCATTGCCCGGGCGAGTTCACCCCCTCCGCCCACGCCGCCATGGACAAG

TTCCTGAGCAAAGTGGCCACCGTGCTGACCTCCAAGTACCGCTAAGCCGGTGCCCTGAGGCCGAGGGTCC

CCGCTGCCGCCTCCACCCGGCCGAACCCCTCCCCAACTCCATCATGCCCAGGCTGACCCTCGTCTTGCAA

TAAAGCTCTATCAGCGGCA

>Hedgehog (Erinaceus_europaeus)

TGAGTCCCGCACTTCTGATCCAACAGAGACTCAGAAAGAACTCACCATGGTGCTGTCTGCAACTGACAAG

GCCAACGTCAAGACTTTCTGGGGCAAGCTCGGCGGCCATGGCGGCGAGTATGGCGGCGAGGCTCTGGACA

GAATGTTCCAGGCCCACCCCACCACCAAGACCTACTTCCCCCACTTCGACCTGAACCCGGGCTCCGCTCA

GGTCAAAGGCCATGGCAAGAAGGTGGCAGATGCTCTGACCACTGCTGTGAACAACCTGGACGACGTTCCA

GGAGCCCTGTCTGCCCTGAGCGACCTGCACGCGCACAAGCTGCGTGTGGACCCCGTCAACTTCAAGCTCC

TGAGCCACTGTCTGCTGGTGACCCTGGCCCTCCACCACCCTGCAGACTTCACCCCCGCGGTGCACGCCTC

CCTGGACAAGTTCTTGGCTACAGTGGCCACTGTGCTGACCTCCAAGTACCGTTAAGCCACAGCCTGTCCA

GTCCCTGTCCTGCAGGGCGTCCCCAACCTCTCAATAAAGTCTGATGGGCAGCA

>Bat (Myotis_lucifugus)

CGTGCCCCTTGCGCCCCGGGCATAAAAGTTCCTCACTCTCCGGGCCGGTACCCCTTCTGGTCCTCGCACA

GACCCAGAAAGAAGCAACCATGGTGCTGTCTCCCGCTGACAAGACCAACATCAAGGCCGCCTGGGACAAG

GTTGGCGCCCATGCCGGCGACTATGGCGCAGAGGCCCTGGAGAGGATGTTCCTGAGCTTCCCCACCACCA

AGACCTACTTCCCCCACTTCGACCTGAGCCACGGCTCTGCCCAGGTCAAAGGCCACGGCAAGAAGGTGGG

CGACGCCCTGGGTAACGCCGTGGCCCACATGGATGACCTGCCCGGCGCCCTGTCCGCCCTGAGCGACCTG

CACGCCTACAAGCTGCGTGTGGACCCCGTCAACTTCAAGCTGCTGGGCCACTGCCTGCTGGTCACCCTCG

CCCGGCACTACCCCGGAGACTTCAGCCCCGCCCTGCAGGCCTCGCTGGACAAGTTTCTGAGCCACGTGAC

TTGGGCGCTGGCCTCCAGCTATCGCTAA

>Walrus (Odobenus_rosmarus)

CCACCATGGTGCTGTCTCCCGCCGACAAGACCAACGTCAAGACCACCTGGGATAAGCTTGGCGGCCACGC

TGGCGAGTATGGCGGAGAGGCTCTGGAGAGGACCTTCATGTCCTTCCCCACCACCAAGACCTACTTCCCC

CACTTCGACCTGAGCCCCGGCTCCGCCCAGGTCAAGGCGCACGGCAAGAAGGTGGCCGACGCGCTGACCA

CCGCTGTGGCCCACATAGATGACCTGCCTGGTGCTCTGTCGGCTCTGAGCGACCTGCACGCGTACAAGCT

GCGTGTGGACCCCGTCAACTTCAAGCTCCTGAGCCACTGCCTGCTGGTGACCCTGGCCTGCCACCACCCC

GCGGAATTCACCCCTGCGGTCCACGCCTCCCTGGACAAGTTCTTCAGCACCGTGAGCACCGTGCTGACCT

CCAAATACCGTTAAGCTGAAGCCGCGGCGGTCCCCCTGTCCCCGGCCCGGGGCTCTCTTGCGCTCGGCGC

ACCTCAACTTCCCGATCTTTGAATAAAGTCTGAGTGGGCTGCAGCCTC
